# Supplementary material for: Reactive Oxygen Species Production by Forward and Reverse Electron Fluxes in the Mitochondrial Respiratory Chain
Source: PLOS journal article supplement (doi:10.1371/journal.pcbi.1001115), 2011-03-31
Supplement: S6 (10.1371/journal.pcbi.1001115.s006) [file journal.pcbi.1001115.s006]

301 Moved Permanently

# Moved Permanently

The document has moved here.

---

Apache Server at www.ploscompbiol.org Port 80
