# Supplementary material for: Reactive Oxygen Species Production by Forward and Reverse Electron Fluxes in the Mitochondrial Respiratory Chain
Source: PLoS Comput Biol. 2011 Mar 31;7(3):e1001115. doi: 10.1371/journal.pcbi.1001115 (PMC3068929; doi:10.1371/journal.pcbi.1001115)
Supplement: Table S1 — Sensitivity of simulation of mitochondrial respiration with regards to the parameters. First column gives the list of parameters, next four columns give the relative change of respectively dynamics of NAD+ reduction in the absence and presence of rotenone, uncoupled respiration fueled by succinate, and pyruvate/malate. Next four columns give the relative change of SQ at Qo site of complex III, in the same four simulations as above, then, relative change of SQ at Qn site of complex I, then FMNH, and finally, reduced N2 centers. The highest changes marked black. (0.03 MB XLS) [file pcbi.1001115.s005.xls]

## Sheet: Sheet1
	χ2: st4	+rot	Suc-u	Pyr-u		SQ@Qo: st4		+rot	Suc-u	Pyr-u	st4pyr			SQ@I: st4	+rot	Suc-u	Pyr-u	st4pyr			FMN: st4	+rot	Suc-u	Pyr-u	st4pyr			N2: st4	+rot	Suc-u	Pyr-u	st4pyr
Complex III
kqp_FS	-1.73768e-05	-9.08388e-05	-0.000281069	7.22959e-07	0.271943		2.73645e-05	3.01726e-05	0.00010623	1.28193e-05	4.70445e-05	0.267563		-3.49168e-06	4.77838e-05	7.43129e-06	-3.91834e-07	-2.26582e-05	0.195808		2.4802e-07	5.25622e-05	4.27404e-06	-9.99942e-08	1.27321e-06	0.0220994		-5.02996e-06	6.26633e-06	5.29419e-06	-5.64137e-07	-2.66927e-05	0.206794
krqp_FS	3.97846e-08	0.00010539	1.13068e-07	-2.68082e-07	0.0103588		-1.55695e-08	-5.3134e-05	-8.74117e-09	7.16875e-08	2.59106e-06	0.270673		2.07481e-07	5.60923e-05	-1.0967e-09	5.38176e-08	-8.20556e-06	0.153382		1.76716e-08	6.17015e-05	-6.24264e-10	3.05831e-08	-8.94394e-07	0.168721		2.26824e-07	7.08251e-05	-9.32368e-10	3.38629e-08	-8.22111e-06	0.0648875
kFS_c1	-0.00173332	4.85914e-05	0.00339271	-2.81513e-06	0.137795		0.00178442	0.0017648	-0.000463107	3.17464e-05	0.00475055	0.0427978		-7.6436e-05	0.000638664	-4.30031e-05	1.33706e-07	-0.00145668	0.00269625		4.78569e-05	0.000702531	-2.43777e-05	3.13253e-07	0.000296751	0.00152314		-0.000225041	-0.000190524	-3.12601e-05	-5.1704e-07	-0.00194602	0.00194365
krFS_c1	0.00171186	-0.000706114	3.52341e-05	2.47039e-07	0.0987179		-0.00127788	-0.00198148	2.09549e-05	-3.06639e-05	-0.0047412	0.0534443		-0.000950349	-0.0084975	4.48571e-06	3.76895e-07	0.00145111	0.0345347		-9.73149e-05	-0.00934725	2.45801e-06	-2.01469e-08	-0.000296613	0.0194936		-0.000901267	0.000303725	3.72446e-06	8.36966e-07	0.00193968	0.0186268
kqp_bl	-0.00590168	0.0103588	-0.000516496	-8.44573e-06			-0.184062	-0.182053	-0.0427978	-0.0534443	-0.249662	0.573946		-1.2907e-05	-0.00220946	4.7256e-06	6.49819e-07	-0.00473451	0.176714		0.000181851	-0.00243041	2.81744e-06	7.93539e-07	0.000988715	0.0619556		-0.000526087	-0.00118253	1.95864e-06	-1.72965e-06	-0.0063814	0.234925
krqp_bl	0.00426198	0.000525751	0.00228367	9.81463e-06			0.154588	0.152602	0.0413037	0.0521821	0.224247			-0.00306499	-0.0101662	-1.69154e-05	-9.40918e-07	0.00354712			-0.000623693	-0.0111829	-9.75577e-06	-9.54065e-07	-0.000744145			-0.00255579	0.00047441	-1.03671e-05	1.50593e-06	0.00478889
kbl_bh	-0.00752568	0.00474002	-0.00220415	-7.78944e-06			-0.216184	-0.214258	-0.0300294	-0.0354286	-0.277463			-0.000321274	0.000700324	1.61183e-05	9.07841e-07	-0.00590412			0.000128767	0.000770357	9.26276e-06	7.73735e-07	0.00122996			-0.000884468	-0.000836417	1.05998e-05	-7.48088e-07	-0.00795064
krbl_bh	0.00460285	0.00891822	-0.000684683	6.55499e-06			0.191609	0.191525	0.0266921	0.0313419	0.260404			-0.00428425	-0.00715294	6.67423e-06	-5.0581e-07	0.00516702			-0.000598061	-0.00786823	3.72076e-06	-5.2271e-07	-0.00108138			-0.00389536	0.000143422	5.50223e-06	8.56219e-07	0.00696582
Kbh-qn1	-0.00369368	0.00869274	0.000735964	-3.85054e-06			-0.101269	-0.0996518	-0.0182364	-0.0211463	-0.133228			-0.00144289	-0.00242862	-2.3745e-06	3.65065e-07	-0.00250727			-6.51722e-05	-0.00267148	-1.2981e-06	3.67147e-07	0.000517624			-0.00173342	-0.000920257	-1.93923e-06	-5.4499e-07	-0.00337112
Krbh-qn1	0.00380037	0.00853512	0.000213825	1.38663e-05			0.0995167	0.0975628	0.0180828	0.0209002	0.1312			0.00157791	-0.0124602	-3.75962e-07	-0.000127022	0.0024091			2.52063e-05	-0.0137062	-2.60305e-07	-7.23446e-05	-0.000505628			0.00194443	-0.00013105	7.28309e-08	-7.46308e-05	0.00324841
kbh_qn2	-0.00249651	0.00914613	0.000588608	-1.62289e-06			-0.0820572	-0.0824589	-0.00255829	-0.00376157	-0.109181			0.000236856	-0.00432103	-8.79614e-07	2.32108e-07	-0.00153514			0.000100068	-0.00475313	-4.93266e-07	1.54091e-07	0.000591784			1.95827e-05	-0.0011718	-4.38238e-07	1.24306e-08	-0.00235231
krbh_qn2	0.00277528	-0.000754761	9.34586e-05	-5.72586e-08			0.0731225	0.072753	0.00159456	0.00235829	0.098615			0.00105437	-0.000446977	-9.0142e-07	6.21825e-08	0.00150811			-3.86784e-05	-0.000491675	-5.17151e-07	2.16444e-08	-0.000322348			0.00136649	0.000273064	-5.99095e-07	1.24743e-07	0.00204477
kqHbnd	-0.0028726	-0.00278466	-0.000883153	-4.78977e-05			-0.0868279	-0.0852892	0.000110383	-3.14358e-05	-0.146216			-0.0053572	0.00184229	6.0153e-06	-8.95291e-06	-0.00156113			-0.000478281	0.00202651	6.31775e-06	3.20745e-06	0.000278769			-0.00555851	0.000419858	-7.57299e-06	-2.64386e-05	-0.00199973
krqHbnd	0.000968803	0.000245291	0.00731964	-1.49853e-07			0.0839622	0.0844259	-0.000603222	0.000103435	0.144004			0.000666633	-0.000614028	-6.31179e-05	3.00735e-07	0.00130641			1.12168e-05	-0.000675431	-3.59912e-05	9.55441e-09	-0.000232566			0.000726332	0.000181232	-4.48565e-05	5.59887e-07	0.00166633
kqnbnd	-0.00264525	0.000176513	-0.000225535	2.25911e-06			-0.0848749	-0.0845545	-0.0002586	-0.000339383	-0.102765			-0.000200855	0.000912674	2.13682e-06	-4.28977e-07	-0.00169088			6.81292e-05	0.00100394	1.21798e-06	-2.40025e-07	0.000492877			-0.000422119	-0.000295193	1.85874e-06	1.45856e-07	-0.00239424
krqnbnd	0.00220076	-0.000187559	0.000173549	-4.10951e-06			0.0755221	0.0753415	0.000255149	0.000331483	0.0981792			0.000177142	-0.000753771	-1.62571e-06	7.97228e-07	0.0014171			-5.60847e-05	-0.000829148	-9.26558e-07	4.49374e-07	-0.000295907			0.000360742	0.000251215	-1.48062e-06	1.05921e-07	0.00190133
kqpdis	-0.00361207	0.00287574	-0.00099254	-0.000131135			-0.143247	-0.142856	-0.0144924	-0.0184443	-0.207969			0.00164798	-0.00865231	8.1893e-06	1.04159e-05	-0.00338517			0.000260672	-0.00951754	6.57247e-06	1.13767e-05	0.000709858			0.00137579	-0.000294748	-1.28989e-05	-2.03727e-05	-0.00457291
krqpdis	0.00167925	-0.00475567	0.00520317	0.000129886			0.10198	0.101272	0.0136172	0.01794	0.174482			-0.00101316	0.00151693	-4.13251e-05	-1.193e-05	0.00153814			-9.85634e-05	0.00166862	-2.5427e-05	-1.22419e-05	-0.000329343			-0.000957184	0.000559291	-1.14333e-05	1.92873e-05	0.00209552
kqhnds	-0.00274287	0.00975208	-0.00128252	-1.35057e-06			-0.0862526	-0.0864704	-0.00290536	-0.00394628	-0.106237			0.000295432	-0.00317494	6.74269e-06	1.57504e-07	-0.001263			0.00010885	-0.00349244	3.85029e-06	1.11982e-07	0.000540963			5.51662e-05	-0.00110628	4.81396e-06	-4.38428e-08	-0.00199737
krqhnds	0.00272215	-6.61953e-05	0.000702001	-9.19799e-07			0.0833319	0.0830015	0.000120318	0.000163699	0.102739			-8.15818e-05	-0.000835551	-1.9768e-06	2.46774e-07	0.00152004			-8.76547e-05	-0.000919106	-1.1245e-06	1.38967e-07	-0.000323766			0.000157636	0.000327994	-1.14191e-06	1.63105e-07	0.00206417
kc1c	-0.271943	0.00695542	0.00517065	8.85294e-05			0.267563	0.270673	6.79696e-05	0.000503352	0.573946			-0.0213408	0.10528	-6.89541e-05	5.37234e-05	-0.176714			0.00720423	0.115808	-3.8301e-05	3.27851e-05	0.0351001			-0.0456992	-0.0305519	-4.7929e-05	2.74496e-05	-0.234925
Complex I
kfI0	0.0642432	7.31417e-05	0.000916584	-0.085637			0.000645134	-5.12006e-05	0.00131804	0.0144984	-0.095677			0.00398855	0.0655357	0.00139727	0.0175731	0.1358			0.00102664	0.0720893	0.000796608	0.00998921	0.0155787			0.00334111	-0.000806789	0.000834051	0.0104276	0.133505
krI0	-0.0632384	3.32211e-05	0.0110904	0.0842812			-0.00165015	-1.89e-06	-0.00245583	-0.0137075	0.0906813			-0.00568279	-0.0652517	-0.00147371	-0.0166005	-0.127862			-0.00128893	-0.0717769	-0.00084011	-0.00943641	-0.0146585			-0.0049724	0.000874789	-0.00089197	-0.00985094	-0.125706
kfI1	0.123545	-3.57218e-05	0.00067059	-0.0814081			0.0011926	1.9096e-06	0.00133144	0.0137634	-0.113486			0.00715164	0.0655717	0.00138126	0.0165784	0.152837			-0.0170289	0.0720939	0.000733718	0.00868585	-0.00905705			0.0182365	-0.000836528	0.000827826	0.00988973	0.168607
krI1	-0.118217	0.000138165	0.00322081	0.0188053			-0.00332259	-5.51111e-05	-0.000542533	-0.00311137	0.0838677			-0.0130104	-0.0652948	-0.000305425	-0.00369445	-0.10988			0.0166237	-0.0717889	-0.000135371	-0.00154985	0.0135907			-0.0243999	0.000904671	-0.000187062	-0.00223097	-0.1261
kfI2	0.0618946	0.00623609	-0.00194479	-0.0187146			0.000959311	0.000114894	0.000473765	0.00322065	-0.0603894			0.00791386	0.058921	0.00029979	0.0039108	0.0884587			6.83486e-05	0.0542203	2.94256e-05	0.000237148	0.00339007			0.00599969	-0.0107061	3.96592e-05	0.000338394	0.0803135
krI2	-0.0589224	-0.00226659	0.00745685	0.018938			0.000401576	1.84704e-06	-0.00105737	-0.00300097	0.0615404			-0.0034905	-0.0679768	-0.000364291	-0.00366305	-0.0886703			0.000297277	-0.0642027	-6.50649e-05	-8.01397e-05	-0.00321299			-0.00130982	0.010585	-8.29462e-05	-0.000174611	-0.0806151
kfI3	0.12356	0	-0.00230292	-0.0255023			0.000781008	0	0.00052147	0.00427466	-0.155102			-0.11521	0	-0.00252046	-0.0345347	0.028969			-0.0220994	0	-0.00141884	-0.0194936	-0.0619556			-0.085003	0	-0.00136253	-0.0186268	0.106418
krI3	-0.115656	0	1.23847e-05	0.000248458			-0.000988347	0	-3.75139e-06	-4.1575e-05	0.0901544			0.113889	0	2.17596e-05	0.000274193	0.010803			0.0217112	0	1.25738e-05	0.000201265	0.0213842			0.0839719	0	1.15014e-05	0.000108485	-0.0226445
kfI6	0.120596	-2.29715e-07	-1.134e-05	-0.000280837			0.00102275	-4.74789e-07	3.66164e-06	4.69352e-05	-0.0904797			-0.109559	0.00229989	-2.15e-05	-0.000264409	-0.00662304			-0.0217122	0.0025267	-2.20061e-05	-0.000318893	-0.021345			-0.088374	-0.0119297	-2.04384e-05	-0.000173976	0.0209779
krI6	-0.115784	2.39794e-07	5.86865e-06	0.000127949			-0.00102202	5.49944e-07	-1.80976e-06	-2.14354e-05	0.0899912			0.110314	-0.00232231	1.0094e-05	9.26685e-05	0.0071336			0.0220198	-0.00255132	1.06317e-05	0.000161537	0.0204862			0.0889714	0.0120422	9.31308e-06	1.95677e-05	-0.0195009
kfI8	0.0606019	2.39689e-06	-0.000163217	-0.000650296			-0.00062954	6.73598e-06	2.37873e-05	0.000103635	-0.0505043			-0.0966799	0.0106714	7.03235e-06	0.000125369	-0.00895345			-0.0075451	0.0117386	6.5075e-06	7.42131e-05	-0.000140846			-0.103288	-0.0325089	-0.000718295	-0.0007595	-0.0116693
krI8	-0.0604738	-2.01623e-06	0.00062606	0.000650909			-0.000963449	-6.77893e-06	-8.22679e-06	-0.000103729	0.050672			0.0920991	-0.0107515	-6.73269e-06	-0.000125429	0.00912574			0.00697484	-0.0118267	-6.35834e-06	-7.42551e-05	0.00032198			0.0987123	0.0327479	0.000725465	0.000761689	0.0116799
kfI7	0.0612136	0.00451946	0.000482981	-0.000401316			5.5904e-05	-5.66001e-05	1.44533e-05	6.44329e-05	-0.069002			-0.101902	0.00483749	-2.86385e-06	6.59633e-05	-0.0200676			-0.00799715	0.00532124	1.26062e-06	4.58175e-05	-0.00123823			-0.108856	-0.035128	-0.000836433	-0.00231179	-0.0236767
krI7	-0.0603399	0.00010312	0.000449581	0.000145291			-0.000995034	-5.65727e-05	1.47594e-05	-2.32112e-05	0.0495721			0.100244	-0.00669226	3.06254e-06	-2.37491e-05	0.0141881			0.00777773	-0.00736149	-7.93029e-07	-1.64942e-05	0.000871383			0.107208	0.0351531	0.000736363	0.000833129	0.0167791
TCA cycle
ktca	8.03525e-08	0.000104509	4.57306e-06	-0.000858793			-5.10096e-08	-5.22511e-05	-4.78912e-07	0.000142491	-0.000885852			3.92367e-08	5.60588e-05	-4.38469e-08	0.000172775	0.00125292			2.7577e-09	6.16647e-05	-2.49585e-08	9.82116e-05	0.000143463			5.57585e-08	7.10002e-05	-3.14645e-08	0.000102522	0.001232
kMDH	-1.38155e-07	-1.8377e-06	2.52164e-06	-0.00147197			-2.30351e-07	2.2842e-08	-1.97019e-07	0.000237924	-0.00137573			1.27731e-07	3.18305e-06	6.19063e-08	0.000288354	0.00194887			3.79682e-08	3.50136e-06	3.53133e-08	0.000163912	0.000223194			1.00857e-07	1.38582e-07	3.41307e-08	0.000171122	0.00191636
kspe	0.000366411	-0.00112881	-0.00319995	0			0.000504345	-0.00035263	0.000259423	0	0			0.000855608	0.000462492	1.65693e-05	0	0			7.35618e-05	0.000508741	9.39883e-06	0	0			0.000899986	0.000336824	1.23564e-05	0	0
kme	-0.00068159	0.00115559	-5.39181e-05	0.0124081			8.63183e-05	3.74164e-06	4.48871e-05	-0.00164376	0.00387856			0.000452561	0.0150888	7.44006e-05	-0.0019875	-0.00547773			0.000108982	0.0165976	4.2433e-05	-0.0011298	-0.000630609			0.000387509	-0.000233155	4.42356e-05	-0.00117957	-0.00538275
kpyrIn	0	0	0	-0.000131681			0	0	0	2.16275e-05	-6.13767e-05			0	0	0	2.61514e-05	7.56278e-05			0	0	0	1.48657e-05	8.62733e-06			0	0	0	1.55162e-05	7.41507e-05
ksfe	0.00716307	-0.00630856	0.00369972	-0.018772			-0.000614872	-0.000392469	-0.00176103	0.00387742	0.000147177			-0.00659893	-0.153382	-0.00144312	0.00617291	0.0124888			-0.00129666	-0.168721	-0.000822675	0.00351115	0.00414944			-0.0060104	0.00210254	-0.000865632	0.00365481	0.0094886
kcs	5.99803e-08	-0.00107879	-0.000523744	-0.0987179			-1.20915e-08	-0.00017939	0.000116592	0.0163655	-0.0945436			8.77143e-08	-0.000511749	9.70835e-06	0.0198419	0.133969			1.30644e-08	-0.000562924	5.52372e-06	0.0112789	0.0153499			9.42834e-08	-6.96095e-05	7.0011e-06	0.0117739	0.131721
VSDH	-0.11842	0.00372318	-0.137795	-0.07171			-0.0289317	-0.0290377	0.0390908	0.0113208	-0.042468			0.195808	-0.0240412	0.00269625	0.0121588	0.0462663			0.0149759	-0.0264453	0.00152314	0.00690936	0.00249299			0.206794	0.0648875	0.00194365	0.00722398	0.048362
